# Supplementary material for: Removal of Staphylococcus aureus from skin using a combination antibiofilm approach
Source: PubMed Central journal article supplement (PMC6079078; doi:10.1038/s41522-018-0060-7), 2018-08-06
Supplement: 41522_2018_60_MOESM1_ESM.pdf [file 41522_2018_60_MOESM1_ESM.pdf]

# Removal of *Staphylococcus aureus* from skin using a combination antibiofilm approach (Supplementary Materials)

Yi Wang<sup>1</sup>, Xiaojuan Tan<sup>2</sup>, Chuanwu Xi<sup>2</sup>, K. Scott Phillips<sup>1\*</sup>

1. United States Food and Drug Administration, Office of Medical Products and Tobacco, Center for Devices and Radiological Health, Office of Science and Engineering Laboratories, Division of Biology, Chemistry and Materials Science, 10903 New Hampshire Ave, Silver Spring, MD 20993, USA

2. Department of Environmental Health Sciences, School of Public Health, University of Michigan, 6631 SPH Tower, 1415 Washington Heights, Ann Arbor, MI 48109, USA

\*Corresponding author: [kenneth.phillips@fda.hhs.gov](mailto:kenneth.phillips@fda.hhs.gov)

## Supplementary Methods

**Supernatant preparation** *L. rhamnosus* supernatants obtained from one colony at different culture time (0, 2, 4, 8, 16, and 24h) were initially tested for inhibition of *S. aureus* ( $\sim 10^6$  CFU/mL) growth in 96-well microtiter plates (supplementary test). Briefly, supernatants (0.1 mL/each) and *S. aureus* solution (0.1 mL,  $10^6$  CFU/mL) were added to each well and cultured for 24h at 37°C. Based on the result, we always use the probiotic supernatant collected after overnight (16-18h) culture if not mentioned specifically. We acquired the supernatants with a 0.22 $\mu$ m membrane filter (EMD Millipore, Germany) after centrifugation.

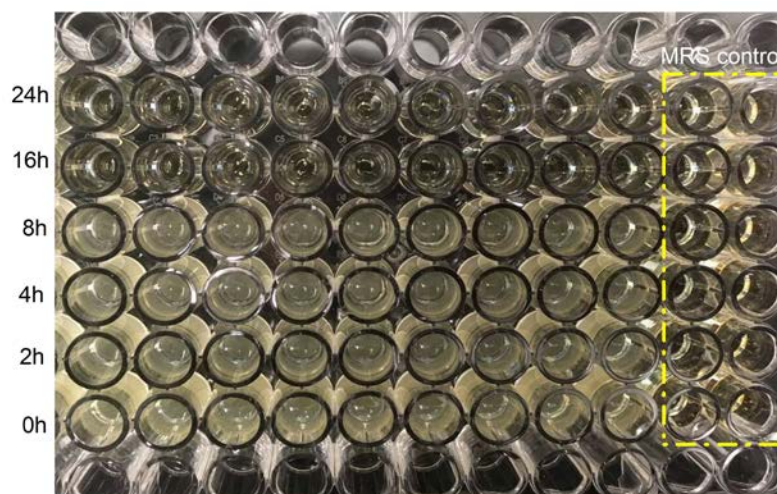

**Supplementary Figure 1 (S1).** Probiotic supernatant (*Lactobacillus rhamnosus* NBRC 3425) obtained from one colony and cultured for different time (0, 2, 4, 8, 16 and 24h) inhibit *S. aureus* ( $10^6$  CFU/mL) growth. If not

mentioned specifically, all probiotic supernatant in subsequent intervention testing was obtained from overnight culture (16-18h).

#### Data Availability

**Figure 4**

| PC  | stdev | A4   | stdev | A6   | stdev | B    | stdev | BA     | stdev  |
|-----|-------|------|-------|------|-------|------|-------|--------|--------|
| 100 | 0     | 13.2 | 2.69  | 1.00 | 0.268 | 4.36 | 1.82  | 0.0632 | 0.0107 |

**Figure 5**

| initial probiotic concentrations | planktonic ( $10^6$ CFU/mL) | stdev | biofilm ( $10^6$ CFU/mL) | stdev |
|----------------------------------|-----------------------------|-------|--------------------------|-------|
| 1.00E+10                         | 48                          | 28    | 88                       | 65    |
| 1.00E+08                         | 59                          | 11    | 106                      | 52    |
| 1.00E+06                         | 93                          | 18    | 238                      | 71    |
| 1.00E+04                         | 226                         | 83    | 284                      | 58    |
| 0                                | 309                         | 116   | 813                      | 323   |

**Figure 6**

| PC  | stdev | PB2+2 | stdev | PB2+24 | stdev | PB2+2+B | stdev   | PB2+24+B | stdev   |
|-----|-------|-------|-------|--------|-------|---------|---------|----------|---------|
| 100 | 0     | 24.6  | 14.0  | 2.97   | 2.73  | 0.00674 | 0.00154 | 0.00742  | 0.00546 |
